# Supplementary material for: The Prevalence of Legal Performance-Enhancing Substance Use and Potential Cognitive and or Physical Doping in German Recreational Triathletes, Assessed via the Randomised Response Technique
Source: PubMed Central journal article supplement (PMC6956052; doi:10.3390/sports7120241), 2019-11-26
Supplement: sports-07-00241-s001.pdf [file sports-07-00241-s001.pdf]

Supplementary Data

# The Prevalence of Legal Performance-Enhancing Substance Use and Potential Cognitive and or Physical Doping in German Recreational Triathletes, Assessed via the ‘Randomised Response Technique’

Sebastian Seifarth <sup>1,2</sup>, Pavel Dietz <sup>3</sup>, Alexander C. Disch <sup>1</sup>, Martin Engelhardt <sup>4</sup> and Stefan Zwingenberger <sup>1\*</sup>

<sup>1</sup> Department of Sports Medicine at the University Center for Orthopedics and Traumatology, University Medicine Carl Gustav Carus, Technical University Dresden, Dresden, Germany

<sup>2</sup> Bundeswehr hospital Ulm, Ulm, Germany

<sup>3</sup> Institute of Occupational, Social and Environmental Medicine, University of Mainz, Mainz, Germany

<sup>4</sup> Department of Orthopedics, Trauma and Hand Surgery, Klinikum Osnabrück, Osnabrück, Germany

\* Correspondence: Stefan.Zwingenberger@uniklinikum-dresden.de; Tel.: +49-1727908318

**Table S1.** Influence of the longest distance raced on doping prevalence.

| Variable (longest distance raced over last 12 month) |    |         | ‘yes’ | ‘no’ | <i>a</i> | $\hat{\pi}_s$ (%) | SE( $\hat{\pi}_s$ ) | 95% CI   | Power |
|------------------------------------------------------|----|---------|-------|------|----------|-------------------|---------------------|----------|-------|
| None                                                 | pd | n = 287 | 52    | 235  | 0.181    | 2.7               | 0.034               | -3.9-9.3 | 0.22  |
|                                                      | cd | n = 298 | 79    | 219  | 0.265    | 15.2              | 0.038               | 7.7-22.7 | 1     |
| Super sprint or sprint                               | pd | n = 550 | 115   | 435  | 0.209    | 6.9               | 0.026               | 1.8-11.9 | 0.88  |
|                                                      | cd | n = 567 | 136   | 431  | 0.24     | 11.4              | 0.027               | 6.2-16.7 | 1     |
| Olympic distance                                     | pd | n = 475 | 107   | 368  | 0.225    | 9.3               | 0.029               | 3.7-14.9 | 0.96  |
|                                                      | cd | n = 494 | 113   | 381  | 0.229    | 9.8               | 0.028               | 4.3-15.3 | 0.98  |
| Half-distance or long-distance                       | pd | n = 491 | 105   | 386  | 0.214    | 7.6               | 0.028               | 2.2-13.0 | 0.9   |
|                                                      | cd | n = 509 | 95    | 414  | 0.187    | 3.5               | 0.026               | -1.5-8.6 | 0.42  |

The given ‘yes’ and ‘no’ answers, for physical doping (pd, grey-background) and cognitive doping (cd, white-background) are presented separately for different race distances, as are the percentage of ‘yes’ answers from the sub-population. For all ‘yes’ answers (*a*), the standard error (SE), confidence interval (CI) and the calculated prevalence estimates ( $\hat{\pi}_s$ ) are provided. A Post-hoc power analyses (Power) was performed to verify the results.

**Table S2.** Factors associated with physical and cognitive doping.

| Variable                                                                            |    |           | ‘yes’ | ‘no’  | <i>a</i> | $\hat{\pi}_s$ (%) | SE( $\hat{\pi}_s$ ) | 95% CI    | Power |
|-------------------------------------------------------------------------------------|----|-----------|-------|-------|----------|-------------------|---------------------|-----------|-------|
| <b>Gender</b>                                                                       |    |           |       |       |          |                   |                     |           |       |
| female                                                                              | pd | n = 419   | 84    | 335   | 0.201    | 5.6               | 0.029               | -0.1-11.3 | 0.66  |
|                                                                                     | cd | n = 437   | 110   | 327   | 0.252    | 13.2              | 0.031               | 7.1-19.3  | 1     |
| male                                                                                | pd | n = 1,381 | 295   | 1,086 | 0.214    | 7.5               | 0.016               | 4.3-10.8  | 1     |
|                                                                                     | cd | n = 1,428 | 312   | 1,116 | 0.219    | 8.3               | 0.016               | 5.1-11.5  | 1     |
| <b>A-level (German diploma, that qualifies the holder for university admission)</b> |    |           |       |       |          |                   |                     |           |       |

|                                                        |    |           |     |       |       |      |       |          |      |
|--------------------------------------------------------|----|-----------|-----|-------|-------|------|-------|----------|------|
| yes                                                    | pd | n = 1,264 | 269 | 995   | 0.213 | 7.4  | 0.017 | 4.1-10.8 | 1    |
|                                                        | cd | n = 1,306 | 318 | 988   | 0.244 | 12.0 | 0.018 | 8.5-15.5 | 1    |
| no                                                     | pd | n = 524   | 102 | 422   | 0.195 | 4.7  | 0.026 | -0.4-9.8 | 0.61 |
|                                                        | cd | n = 547   | 99  | 448   | 0.181 | 2.7  | 0.025 | -2.1-7.5 | 0.32 |
| <b>Years doing endurance sports#</b>                   |    |           |     |       |       |      |       |          |      |
| ≤ 10 years                                             | pd | n = 963   | 198 | 765   | 0.256 | 6.3  | 0.019 | 2.5-10.1 | 0.96 |
|                                                        | cd | n = 1,000 | 217 | 783   | 0.217 | 8.0  | 0.019 | 4.2-11.8 | 1    |
| > 10 years                                             | pd | n = 658   | 149 | 509   | 0.226 | 9.4  | 0.024 | 4.7-14.2 | 1    |
|                                                        | cd | n = 679   | 158 | 521   | 0.233 | 10.4 | 0.024 | 5.6-15.1 | 1    |
| <b>Training in a group</b>                             |    |           |     |       |       |      |       |          |      |
| yes                                                    | pd | n = 907   | 181 | 726   | 0.2   | 5.4  | 0.02  | 1.6-9.3  | 0.89 |
|                                                        | cd | n = 936   | 223 | 713   | 0.238 | 11.2 | 0.021 | 7.1-15.3 | 1    |
| no                                                     | pd | n = 883   | 195 | 688   | 0.221 | 8.6  | 0.021 | 4.5-12.7 | 1    |
|                                                        | cd | n = 918   | 199 | 719   | 0.217 | 8.0  | 0.02  | 4.0-12.0 | 1    |
| <b>Age#</b>                                            |    |           |     |       |       |      |       |          |      |
| ≤ 39 years                                             | pd | n = 933   | 181 | 752   | 0.194 | 4.6  | 0.019 | 0.8-8.4  | 0.8  |
|                                                        | cd | n = 956   | 220 | 736   | 0.23  | 10.0 | 0.02  | 6.0-14.0 | 1    |
| > 39 years                                             | pd | n = 844   | 193 | 651   | 0.229 | 8.9  | 0.022 | 5.6-14.0 | 1    |
|                                                        | cd | n = 885   | 196 | 689   | 0.222 | 8.7  | 0.021 | 4.6-12.8 | 1    |
| <b>Competition performed within the last 12 months</b> |    |           |     |       |       |      |       |          |      |
| yes                                                    | pd | n = 1,523 | 328 | 1,195 | 0.215 | 7.8  | 0.016 | 4.7-10.9 | 1    |
|                                                        | cd | n = 1,577 | 348 | 1,229 | 0.221 | 8.6  | 0.016 | 5.5-11.6 | 1    |
| no                                                     | pd | n = 280   | 51  | 229   | 0.182 | 2.8  | 0.034 | -3.9-9.6 | 0.22 |
|                                                        | cd | n = 284   | 75  | 209   | 0.264 | 15.0 | 0.039 | 7.4-22.7 | 1    |
| <b>Use of legal/ freely available substances</b>       |    |           |     |       |       |      |       |          |      |
| yes                                                    | pd | n = 554   | 119 | 435   | 0.215 | 7.7  | 0.026 | 2.6-12.8 | 0.93 |
|                                                        | cd | n = 574   | 130 | 444   | 0.227 | 9.4  | 0.026 | 4.3-14.5 | 0.98 |
| no                                                     | pd | n = 1,239 | 258 | 981   | 0.208 | 6.7  | 0.017 | 3.4-10.1 | 1    |
|                                                        | cd | n = 1,284 | 290 | 994   | 0.226 | 9.4  | 0.017 | 5.9-12.8 | 1    |
| <b>Use of analgesics during the last three months</b>  |    |           |     |       |       |      |       |          |      |
| yes                                                    | pd | n = 198   | 48  | 150   | 0.242 | 11.8 | 0.045 | 2.9-20.7 | 0.88 |
|                                                        | cd | n = 209   | 34  | 100   | 0.254 | 13.5 | 0.056 | 2.5-24.5 | 0.84 |
| no                                                     | pd | n = 1,605 | 331 | 1,274 | 0.206 | 6.4  | 0.015 | 3.5-9.4  | 1    |
|                                                        | cd | n = 1,659 | 385 | 1,337 | 0.224 | 9.0  | 0.015 | 6.1-11.9 | 1    |
| <b>Overall hours of training per week#</b>             |    |           |     |       |       |      |       |          |      |
| ≤ 8 hours                                              | pd | n = 995   | 216 | 779   | 0.217 | 8.0  | 0.02  | 4.2-11.9 | 1    |
|                                                        | cd | n = 1,028 | 260 | 768   | 0.253 | 13.4 | 0.02  | 9.4-17.3 | 1    |
| > 8 hours                                              | pd | n = 807   | 163 | 664   | 0.197 | 5.1  | 0.021 | 1.0-9.1  | 0.82 |
|                                                        | cd | n = 839   | 163 | 676   | 0.194 | 4.7  | 0.02  | 0.7-8.6  | 0.78 |

Factors associated with physical (pd, grey-background) and cognitive doping (cd, white-background) are presented separately, as are the percentage of 'yes' answers from the sub-population. For all 'yes' answers (*a*), the standard error (SE), confidence interval (CI) and the calculated prevalence estimates ( $\hat{\pi}_s$ ) are provided. The - continuous scaled variables that are marked '#'- were dichotomised by median and again a Post-hoc power analyses (Power) was performed.

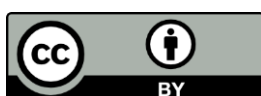

© 2019 by the authors. Submitted for possible open access publication under the terms and conditions of the Creative Commons Attribution (CC BY) license (<http://creativecommons.org/licenses/by/4.0/>).
